# Supplementary material for: Role of Natural Products in the Management of COVID-19: A Saudi Arabian Perspective
Source: MDPI journal article supplement (doi:10.3390/healthcare11111584), 2023-05-28
Supplement: s1 [file s1]

# Role of Natural Products in the Management of COVID-19: A Saudi Arabian Perspective

**Supplementary Table S1: Sociodemographic characteristics of the participants (n=677)**

| Characteristics                            | Variables                | Frequency (Percentage) |
|--------------------------------------------|--------------------------|------------------------|
| Age                                        | 18-25 years              | 179 (26)               |
|                                            | 26-40 years              | 336 (50)               |
|                                            | More than 40 years       | 162 (24)               |
| Gender                                     | Female                   | 486 (72)               |
|                                            | Male                     | 191 (28)               |
| Nationality                                | Saudi                    | 505 (75)               |
|                                            | Non-Saudi                | 172 (25)               |
| Geographical location                      | Central region           | 371 (55)               |
|                                            | Eastern region           | 52 (08)                |
|                                            | Northern region          | 58 (09)                |
|                                            | Southern region          | 40 (06)                |
|                                            | Western region           | 156 (23)               |
| Educational status                         | Intermediate school      | 28 (04)                |
|                                            | High school diploma      | 167 (25)               |
|                                            | Undergraduate            | 418 (62)               |
|                                            | Postgraduate degree      | 64 (10)                |
| Employment status                          | Employed                 | 365 (54)               |
|                                            | Not employed             | 220 (32)               |
|                                            | Student                  | 92 (14)                |
| Marital status                             | Married                  | 383 (57)               |
|                                            | Single                   | 263 (39)               |
|                                            | Separated                | 31 (05)                |
| Family income                              | Less than 5000 SAR       | 145 (21)               |
|                                            | 5000-10000 SAR           | 204 (30)               |
|                                            | More than 10000 SAR      | 328 (48)               |
| Chronic diseases status                    | Yes                      | 122 (18)               |
|                                            | No                       | 555 (82)               |
| Use of prescription drugs                  | Yes                      | 118 (17)               |
|                                            | No                       | 559 (83)               |
| Commitment to MOH instruction for COVID-19 | Full commitment          | 405 (60)               |
|                                            | Committed to some extent | 259 (38)               |
|                                            | Not committed at all     | 13 (02)                |

**Supplementary Table S2: Coefficients of five models of regression analysis**

| Coefficients <sup>a</sup> |                                             |                             |            |                           |        |      |                                 |             |                         |       |
|---------------------------|---------------------------------------------|-----------------------------|------------|---------------------------|--------|------|---------------------------------|-------------|-------------------------|-------|
|                           |                                             | Unstandardized Coefficients |            | Standardized Coefficients | t      | Sig. | 95.0% Confidence Interval for B |             | Collinearity Statistics |       |
|                           |                                             | B                           | Std. Error | Beta                      |        |      | Lower Bound                     | Upper Bound | Tolerance               | VIF   |
| 1                         | (Constant)                                  | .501                        | .017       |                           | 30.301 | .000 | .468                            | .533        |                         |       |
|                           | NP use before COVID                         | .537                        | .013       | .854                      | 42.668 | .000 | .513                            | .562        | 1.000                   | 1.000 |
| 2                         | (Constant)                                  | .396                        | .024       |                           | 16.515 | .000 | .349                            | .443        |                         |       |
|                           | NP use before COVID                         | .516                        | .013       | .821                      | 40.395 | .000 | .491                            | .541        | .924                    | 1.083 |
|                           | Priority for NP use always                  | .111                        | .019       | .120                      | 5.907  | .000 | .074                            | .147        | .924                    | 1.083 |
| 3                         | (Constant)                                  | .349                        | .028       |                           | 12.518 | .000 | .295                            | .404        |                         |       |
|                           | NP use before COVID                         | .509                        | .013       | .809                      | 39.389 | .000 | .483                            | .534        | .893                    | 1.120 |
|                           | Priority for NP use always                  | .104                        | .019       | .113                      | 5.583  | .000 | .068                            | .141        | .914                    | 1.094 |
|                           | Combination of NP with other drugs COVID-19 | .048                        | .015       | .064                      | 3.190  | .001 | .018                            | .078        | .942                    | 1.061 |
| 4                         | (Constant)                                  | .314                        | .031       |                           | 10.208 | .000 | .254                            | .375        |                         |       |
|                           | NP use before COVID                         | .496                        | .014       | .789                      | 36.245 | .000 | .470                            | .523        | .787                    | 1.271 |
|                           | Priority for NP use always                  | .098                        | .019       | .106                      | 5.215  | .000 | .061                            | .135        | .898                    | 1.113 |
|                           | Combination of NP with other drugs COVID-19 | .043                        | .015       | .056                      | 2.812  | .005 | .013                            | .072        | .924                    | 1.082 |
|                           | NP use by family                            | .056                        | .021       | .057                      | 2.638  | .009 | .014                            | .098        | .800                    | 1.249 |
| 5                         | (Constant)                                  | <b>.267</b>                 | .037       |                           | 7.294  | .000 | .195                            | .339        |                         |       |
|                           | NP use before COVID                         | <b>.497</b>                 | .014       | .790                      | 36.399 | .000 | .470                            | .524        | .787                    | 1.271 |
|                           | Priority for NP use always                  | <b>.098</b>                 | .019       | .106                      | 5.243  | .000 | .061                            | .135        | .898                    | 1.113 |
|                           | Combination of NP with other drugs COVID-19 | <b>.041</b>                 | .015       | .054                      | 2.706  | .007 | .011                            | .071        | .922                    | 1.084 |
|                           | NP use by family                            | <b>.059</b>                 | .021       | .059                      | 2.741  | .006 | .017                            | .100        | .799                    | 1.251 |
|                           | Regions of Saudi Arabia                     | <b>.032</b>                 | .013       | .046                      | 2.393  | .017 | .006                            | .059        | .996                    | 1.004 |

a. Dependent Variable: NP for COVID

**Supplementary Table S3: Impact of significant factors on the Use of NP for COVID-19**

| Model Summary <sup>f</sup>                                                                                                                                         |                   |          |                   |                            |
|--------------------------------------------------------------------------------------------------------------------------------------------------------------------|-------------------|----------|-------------------|----------------------------|
| Model                                                                                                                                                              | R                 | R Square | Adjusted R Square | Std. Error of the Estimate |
| 1                                                                                                                                                                  | .854 <sup>a</sup> | .730     | <b>0.729</b>      | .18090                     |
| 2                                                                                                                                                                  | .862 <sup>b</sup> | .743     | <b>0.742</b>      | .17652                     |
| 3                                                                                                                                                                  | .864 <sup>c</sup> | .747     | <b>0.746</b>      | .17533                     |
| 4                                                                                                                                                                  | .866 <sup>d</sup> | .749     | <b>0.748</b>      | .17456                     |
| 5                                                                                                                                                                  | .867 <sup>e</sup> | .751     | <b>0.750</b>      | .17395                     |
| a. Predictors: (Constant), NP use before COVID                                                                                                                     |                   |          |                   |                            |
| b. Predictors: (Constant), NP use before COVID, Priority for NP use always                                                                                         |                   |          |                   |                            |
| c. Predictors: (Constant), NP use before COVID, Priority for NP use always, Combination of NP with other drugs COVID-19                                            |                   |          |                   |                            |
| d. Predictors: (Constant), NP use before COVID, Priority for NP use always, Combination of NP with other drugs COVID-19, NP use by family                          |                   |          |                   |                            |
| e. Predictors: (Constant), NP use before COVID, Priority for NP use always, Combination of NP with other drugs COVID-19, NP use by family, Regions of Saudi Arabia |                   |          |                   |                            |
| f. Dependent Variable: NP for COVID                                                                                                                                |                   |          |                   |                            |
